# Supplementary material for: Highly oriented two-dimensional formamidinium lead iodide perovskites with a small bandgap of 1.51 eV
Source: Royal Society of Chemistry journal article supplement (doi:10.1039/c7qm00472a), 2017-11-08
Supplement: c7qm00472a1.pdf [file c7qm00472a1.pdf]

Supporting Information for

**Highly Oriented Two-Dimensional Formamidinium Lead Iodide Perovskite with a Small Bandgap of 1.51 eV**

Jielin Yan<sup>†a</sup>, Weifei Fu<sup>†a</sup>, Xinqian Zhang<sup>a</sup>, Jiehuan Chen<sup>a</sup>, Weitao Yang<sup>a</sup>, Weiming Qiu<sup>c</sup>, Gang Wu<sup>a\*</sup>, Feng Liu<sup>b\*</sup>, Paul Heremans<sup>c</sup>, Hongzheng Chen<sup>a\*</sup>

*a....State Key Laboratory of Silicon Materials, MOE Key Laboratory of Macromolecular Synthesis and Functionalization, Department of Polymer Science and Engineering, Zhejiang University, Hangzhou 310027, P. R. China*

*b...Department of Physics and Astronomy and Collaborative Innovation Center of IFSA (CICIFSA), Shanghai Jiaotong University, Shanghai 200240, China*

*c.... IMEC, Kapeldreef 75, Heverlee, B-3001, Belgium.*

<sup>†</sup> These authors contributed equally to this work.

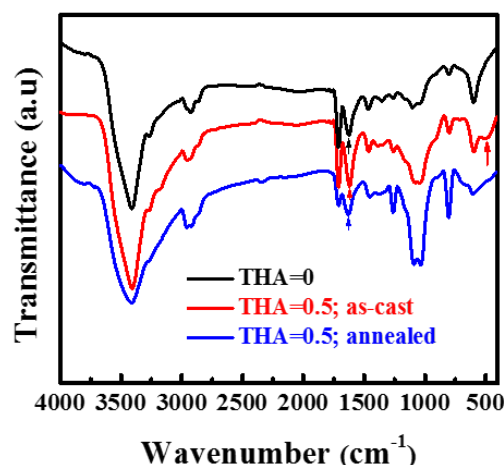

**Figure S1.** Fourier transform infrared (FTIR) spectra of (BA)<sub>2</sub>(FA)<sub>2</sub>Pb<sub>3</sub>I<sub>10</sub> films fabricated with or without thiourea in precursors.

As shown in Figure S1, a weak absorption peak assigned to thiourea appears at around 500 cm<sup>-1</sup> for the as-casted film with 0.5M thiourea.<sup>1</sup> The N-H deformation of

FA group at  $1625\text{ cm}^{-1}$  shifts to  $1620\text{ cm}^{-1}$  when thiourea is added, indicating an interaction between thiourea and FA cation probably due to the H-bond formed between  $-\text{NH}_2$  groups in FA and thiourea.<sup>2</sup> After annealing, the peak at  $500\text{ cm}^{-1}$  disappears and the peak at  $1620\text{ cm}^{-1}$  shifts back to  $1625\text{ cm}^{-1}$ . Thus, we can speculate that thiourea is evaporated after thermal annealing.

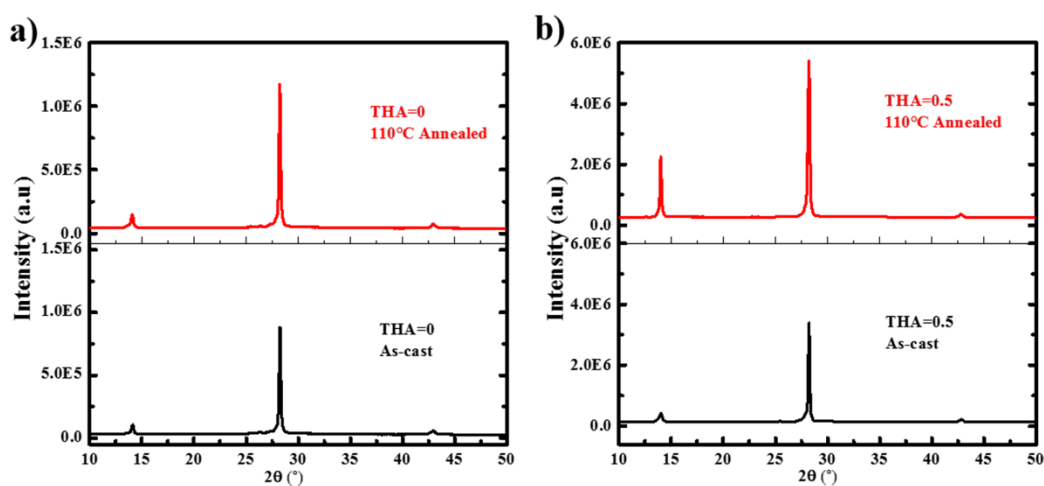

**Figure S2.** XRD patterns of the as-cast and annealed  $(\text{BA})_2(\text{FA})_2\text{Pb}_3\text{I}_{10}$  films fabricated with THA=0 (a) and THA=0.5 (b).

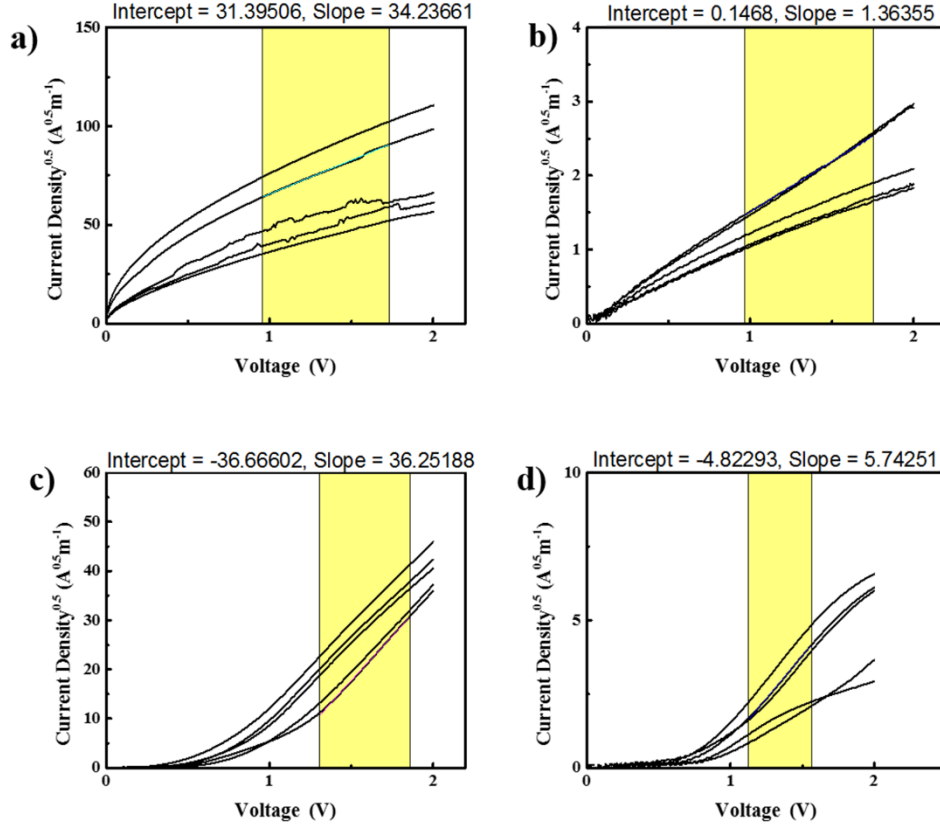

**Figure S3.**  $J_D^{0.5}$ - $V$  curves (each contains five devices) for hole only (a, b) and electron only (c, d) devices of 2D perovskite films with THA=0.5 (a, c) and THA=0 (b, d). The devices were measured under dark state according to space charge limited current (SCLC) method.

The charge mobility was calculated by Mott-Gurney law:

$$J_D = \frac{9}{8} \varepsilon_0 \varepsilon \mu \frac{V^2}{L^3}$$

Where  $J_D$  is current density,  $\varepsilon$  is the static permittivity (here  $\varepsilon \approx 6$  for perovskite),  $\varepsilon_0$  is the permittivity of free space,  $\mu$  is the mobility,  $V$  is the applied voltage, and  $L$  is the film thickness (here  $L=300$  nm). By fitting linear area of the  $J_D^{0.5}$ - $V$  curve, the mobility can be obtained. The final mobility was calculated from five devices on average.

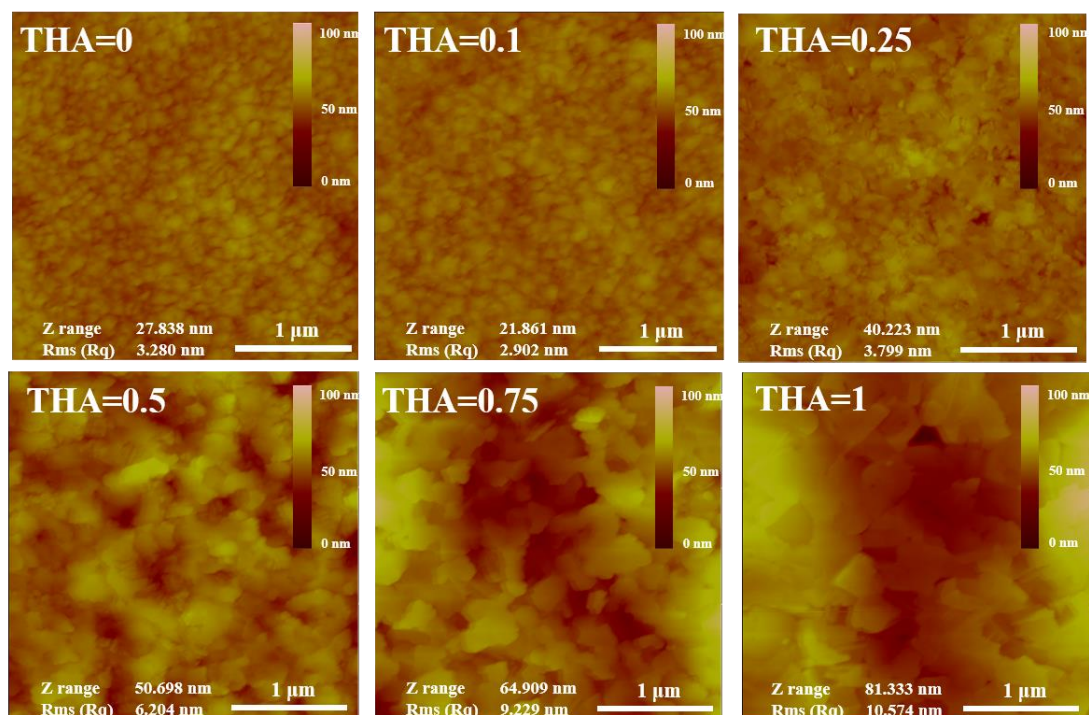

**Figure S4.** AFM images of the annealed  $(\text{BA})_2(\text{FA})_2\text{Pb}_3\text{I}_{10}$  films fabricated with different precursors containing various amounts of thiourea.

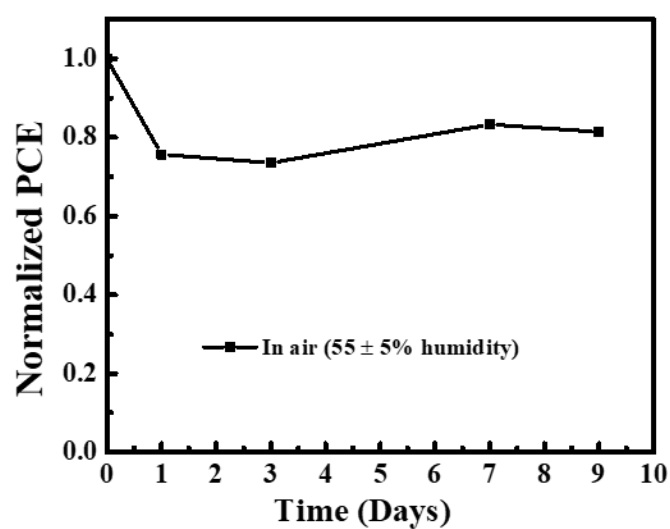

**Figure S5.** Evolution of PCE under relative humidity ( $55 \pm 5\%$ ) for unencapsulated device based on  $(\text{BA})_2(\text{FA})_2\text{Pb}_3\text{I}_{10}$ .

## References

1. G. Madhurambal, M. Mariappan and S. C. Mojumdar, *J. Therm. Anal.*

*Calorim.*, 2010, **100**, 853-856.

2. J. W. Lee, H. S. Kim and N. G. Park, *Acc. Chem. Res.*, 2016, **49**, 311-319
